# Supplementary material
Source: PubMed Central journal article supplement (PMC3443859)
Supplement: NIHMS396205-supplement-Supplement1.pdf [file NIHMS396205-supplement-Supplement1.pdf]

## Supplementary Appendix

This appendix has been provided by the authors to give readers additional information about their work.

Supplement to: Violari A, Lindsey JC, Hughes MD, et al. Nevirapine versus ritonavir-boosted lopinavir for HIV-infected children. *N Engl J Med* 2012;366:2380-9.

## **Table of Contents**

|                                 | <b>Page</b>  |
|---------------------------------|--------------|
| <b>Details of Study Conduct</b> | <b>2</b>     |
| <b>Figure S1</b>                | <b>3</b>     |
| <b>Table S1</b>                 | <b>4</b>     |
| <b>Table S2</b>                 | <b>5</b>     |
| <b>Table S3</b>                 | <b>6</b>     |
| <b>Table S4</b>                 | <b>7-8</b>   |
| <b>Table S5</b>                 | <b>9</b>     |
| <b>Acknowledgements</b>         | <b>10-11</b> |

Members of the P1060 study team designed the study, patient data were collected at the sites and transmitted to Frontier Science (FSTRF, Albany, NY), and data analyses were performed by the Harvard Statistical Data Analysis Center statisticians (JCL, MDH). The manuscript was initially drafted by the study co-chairs (AV, PP) and revised with input from all manuscript authors, who vouch for the data. The P1060 team decided to publish the paper.

**Figure S1: Time to death; solid line = NVP, dashed line = LPV/r**

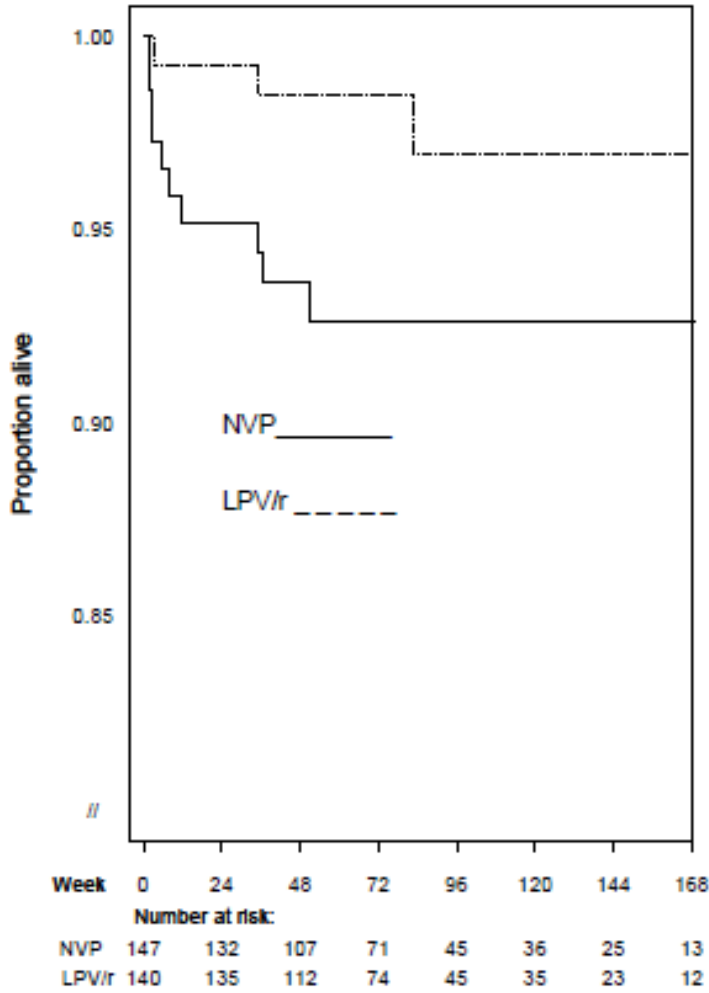



**Table S2**  
**Primary Endpoint: Off Study Treatment or Virologic Failure**

|              |                |            | Type of endpoint met <sup>1</sup> |                   |                    |                       |          |
|--------------|----------------|------------|-----------------------------------|-------------------|--------------------|-----------------------|----------|
|              |                |            | No<br>endpnt                      | Primary<br>endpnt | Off<br>trt<br>only | Virol<br>Fail<br>only | Both     |
| Treatment    | Age<br>stratum | Total<br>N | N                                 | N                 | N                  | N                     | N        |
| <b>Total</b> |                | <b>287</b> | <b>200</b>                        | <b>87</b>         | <b>42</b>          | <b>43</b>             | <b>2</b> |
| <b>LPV/r</b> | 2m - <12m      | 36         | 29                                | 7                 | 4                  | 3                     | 0        |
|              | ≥12m           | 104        | 84                                | 20                | 11                 | 9                     | 0        |
|              | <b>Total</b>   | <b>140</b> | <b>113</b>                        | <b>27</b>         | <b>15</b>          | <b>12</b>             | <b>0</b> |
| <b>NVP</b>   | 2m - <12m      | 41         | 24                                | 17                | 9                  | 8                     | 0        |
|              | ≥12m           | 106        | 63                                | 43                | 18                 | 23                    | 2        |
|              | <b>Total</b>   | <b>147</b> | <b>87</b>                         | <b>60</b>         | <b>27</b>          | <b>31</b>             | <b>2</b> |

<sup>1</sup> Counts indicate whether primary endpoint was from going off study treatment, experiencing virologic failure, or both at the same time

**Table S3: Protocol-defined Toxicity Endpoints**

|                         | <b>NVP</b>   | <b>LPV/r</b> |
|-------------------------|--------------|--------------|
| <b>≥Grade 2B rash</b>   | <b>5</b>     |              |
| <b>≥Grade 3 LFT</b>     | <b>2 (2)</b> |              |
| <b>Neutropenia</b>      | <b>2 (2)</b> | <b>2 (1)</b> |
| <b>Anemia</b>           | <b>1</b>     | <b>1</b>     |
| <b>Thrombocytopenia</b> |              | <b>(1)</b>   |

Numbers depict events; Grade 3 events are numbers without parentheses;

Grade 4 events are numbers in parentheses.

**Table S4:** Numbers of deaths, new  $\geq$  grade 3 signs, symptoms or laboratory abnormalities, new targeted diagnoses and changes in lipids occurring on study treatment. Note that counts within categories may not add up to totals in category as subjects could experience more than one event within the category.

| <b>Event</b>                                                                                                  | <b>NVP<br/>(n=147)</b> | <b>LPV/r<br/>(n=140)</b> | <b>Total<br/>(n=287)</b> |
|---------------------------------------------------------------------------------------------------------------|------------------------|--------------------------|--------------------------|
| <b>Death (on or off study treatment)</b>                                                                      | <b>10 (7%)</b>         | <b>3 (2%)</b>            | <b>13 (5%)</b>           |
|                                                                                                               |                        |                          |                          |
| <b>Grade <math>\geq</math> 3 laboratory abnormality</b>                                                       | <b>66 (45%)</b>        | <b>50 (36%)</b>          | <b>116 (40%)</b>         |
| <b>Potassium</b>                                                                                              | <b>4</b>               | <b>0</b>                 | <b>4</b>                 |
| <b>Sodium</b>                                                                                                 | <b>1</b>               | <b>0</b>                 | <b>1</b>                 |
| <b>Platelets</b>                                                                                              | <b>2</b>               | <b>4</b>                 | <b>6</b>                 |
| <b>Hemoglobin</b>                                                                                             | <b>13</b>              | <b>8</b>                 | <b>21</b>                |
| <b>Absolute Neutrophil Count</b>                                                                              | <b>49</b>              | <b>41</b>                | <b>90</b>                |
| <b>White Blood Cells</b>                                                                                      | <b>1</b>               | <b>0</b>                 | <b>1</b>                 |
| <b>SGOT</b>                                                                                                   | <b>7</b>               | <b>2</b>                 | <b>9</b>                 |
| <b>SGPT</b>                                                                                                   | <b>13</b>              | <b>3</b>                 | <b>16</b>                |
| <b>Creatinine</b>                                                                                             | <b>1</b>               | <b>0</b>                 | <b>1</b>                 |
|                                                                                                               |                        |                          |                          |
| <b>Grade <math>\geq</math> 3 sign/symptom</b>                                                                 | <b>31 (21%)</b>        | <b>28 (20%)</b>          | <b>59 (21%)</b>          |
| <b>General body (fever/weight loss)</b>                                                                       | <b>19</b>              | <b>19</b>                | <b>38</b>                |
| <b>Respiratory (cough, difficulty breathing, SOB, abnormal breath sounds, respiratory system dysfunction)</b> | <b>8</b>               | <b>4</b>                 | <b>12</b>                |
| <b>Circulatory/cardiac (cardiovascular dysfunction, swollen)</b>                                              | <b>2</b>               | <b>1</b>                 | <b>3</b>                 |
| <b>Gastrointestinal (diarrhea, vomiting, appetite loss)</b>                                                   | <b>6</b>               | <b>8</b>                 | <b>14</b>                |
| <b>Reproductive (discharge)</b>                                                                               | <b>1</b>               | <b>0</b>                 | <b>1</b>                 |



|                                                                                   |                                            |                                            |                               |
|-----------------------------------------------------------------------------------|--------------------------------------------|--------------------------------------------|-------------------------------|
| <b>Skin (allergic rash, inflammation, papules, rash-non allergic)</b>             | <b>2</b>                                   | <b>2</b>                                   | <b>4</b>                      |
| <b>Neurologic (convulsion/seizure, weakness)</b>                                  | <b>2</b>                                   | <b>0</b>                                   | <b>2</b>                      |
| <b>Other (dehydration)</b>                                                        | <b>1</b>                                   | <b>0</b>                                   | <b>1</b>                      |
|                                                                                   |                                            |                                            |                               |
| <b>Targeted new diagnoses</b>                                                     |                                            |                                            |                               |
| <b>Immune reconstitution syndrome (IRIS)</b>                                      | <b>3</b>                                   | <b>2</b>                                   | <b>5</b>                      |
| <b>AIDS encephalopathy</b>                                                        | <b>0</b>                                   | <b>2</b>                                   | <b>2</b>                      |
| <b>Malaria</b>                                                                    | <b>40</b>                                  | <b>44</b>                                  | <b>84</b>                     |
| <b>Tuberculosis (disseminated, meningitis, pulmonary, peripheral lymph nodes)</b> | <b>7</b>                                   | <b>5</b>                                   | <b>13</b>                     |
|                                                                                   |                                            |                                            |                               |
| <b>Lipids:<br/>mean (95% CI) change: week 48 minus<br/>baseline</b>               |                                            |                                            | <b>Adjusted *<br/>p-value</b> |
| <b>Total cholesterol (mg/dl)</b>                                                  | <b>39.6<br/>(29.1, 50.1)<br/>(n=67)</b>    | <b>32.9<br/>(23.3, 42.4)<br/>(n=95)</b>    | <b>0.97</b>                   |
| <b>Triglycerides (mg/dl)</b>                                                      | <b>-48.1<br/>(-78.3, -17.8)<br/>(n=65)</b> | <b>-41.8<br/>(-64.6, -18.9)<br/>(n=95)</b> | <b>0.072</b>                  |

\* p-value for treatment difference from linear regression on change from baseline adjusted for entry value

**Table S5: Change from Baseline to Weeks 24 and 48  
Comparison of NVP versus LPV/r treatment**

| Outcome               | Treatment | Week | N   | Mean (95% CI)     | Ttest p-value | Adjusted p-value* |
|-----------------------|-----------|------|-----|-------------------|---------------|-------------------|
| CD4 count (cells/mm3) | NVP       | 24   | 132 | 477 (378, 576)    | 0.89          | 0.74              |
|                       | LPV/r     | 24   | 135 | 468 (378, 557)    |               |                   |
|                       | NVP       | 48   | 109 | 599 (479, 719)    | 0.52          | 0.24              |
|                       | LPV/r     | 48   | 119 | 541 (411, 671)    |               |                   |
| CD4%                  | NVP       | 24   | 132 | 12.4 (11.0, 13.8) | 0.17          | 0.14              |
|                       | LPV/r     | 24   | 135 | 11.1 (9.9, 12.3)  |               |                   |
|                       | NVP       | 48   | 109 | 15.2 (13.6, 16.9) | 0.41          | 0.34              |
|                       | LPV/r     | 48   | 119 | 14.3 (13.0, 15.7) |               |                   |
| Height z-score        | NVP       | 24   | 133 | 0.21 (0.09, 0.32) | 0.30          | 0.24              |
|                       | LPV/r     | 24   | 134 | 0.12 (0.00, 0.24) |               |                   |
|                       | NVP       | 48   | 110 | 0.43 (0.28, 0.57) | 0.10          | 0.10              |
|                       | LPV/r     | 48   | 119 | 0.25 (0.10, 0.40) |               |                   |
| Weight z-score #      | NVP       | 24   | 133 | 1.03 (0.84, 1.23) | 0.084         | 0.007             |
|                       | LPV/r     | 24   | 134 | 0.78 (0.58, 0.99) |               |                   |
|                       | NVP       | 48   | 108 | 1.36 (1.12, 1.60) | 0.064         | 0.009             |
|                       | LPV/r     | 48   | 117 | 1.04 (0.80, 1.27) |               |                   |
| BMI #                 | NVP       | 24   | 133 | 1.1 (0.8, 1.4)    | 0.13          | 0.020             |
|                       | LPV/r     | 24   | 134 | 0.8 (0.5, 1.1)    |               |                   |
|                       | NVP       | 48   | 111 | 1.1 (0.7, 1.4)    | 0.23          | 0.031             |
|                       | LPV/r     | 48   | 119 | 0.8 (0.4, 1.1)    |               |                   |

\* Adjusted for entry value and age stratum

# Favoring the NVP treatment group

**Acknowledgements:** Overall support for the PACTG and the International Maternal Pediatric Adolescent AIDS Clinical Trials Group (IMPAACT) was provided by the National Institute of Allergy and Infectious Diseases (NIAID) [U01 AI068632], the *Eunice Kennedy Shriver* National Institute of Child Health and Human Development (NICHD), and the National Institute of Mental Health (NIMH). The content is solely the responsibility of the authors and does not necessarily represent the official views of the NIH. This work was supported by the Statistical and Data Analysis Center at Harvard School of Public Health, under the National Institute of Allergy and Infectious Diseases cooperative agreement #5 U01 AI41110 with the Pediatric AIDS Clinical Trials Group (PACTG) and #1 U01 AI068616 and U01 AI068632 with the IMPAACT Group. Support of the sites was provided by the National Institute of Allergy and Infectious Diseases (NIAID). Additional support was provided with Federal funds from the National Institute of Allergies & Infectious Diseases, National Institutes of Health, Department of Health and Human Services, under Contract No. HHSN272200800014C.

The IMPAACT P1060 Study Team would like to sincerely thank the children, their families and care providers who agreed to participate in P1060 and place their trust in the Site Clinical Study Teams. We would also like to acknowledge the contributions of the following P1060 Study Team Members: Joan Coetzee, Emily Barr, Phillippa Musoke, Mutsawashe Bwakura-Dangarembizi, Tammy Meyers, Robert Bollinger, George Kafulafula, Namwinga Chintu, Tamara Kuryla, Carrie Fry, and Don Decker as well as Sandi Lehrman.

The Division of AIDS International Data Safety Monitoring Board members were: Haroon Saloojee (chair) (University of the Witwatersrand, Johannesburg); R. DerSimonian (executive secretary); Wafaa El-Sadr (Columbia University Mailman School of Public Health, New York City); David P. Harrington (Harvard School of Public Health, Boston); Jonathan Levin (MRC/UVRI Uganda Research Unit on AIDS; Entebbe, Uganda); Carl Jacobus Lombard (MRC South Africa, Cape Town); Mary Faith Marshall (University of Minnesota, Minneapolis); Lucky Mokgathe (University of Botswana, Gaborone); Paula Munderi (MRC Uganda Research Unit on AIDS, Entebbe); Alwyn Mwinga (Centers for Disease Control Zambia, Lusaka); Andrew Nunn (MRC CTU, London); and Jerome Amir Singh (Nelson Mandela School of Medicine, Durban).

Special thanks go to the following Pharmaceutical representatives and their companies for participation in the design of the trial and for generous provision of the antiretroviral agents used in the study: Lauren Petrella and Peter Piliero, Boehringer Ingelheim Pharmaceuticals; Marisol Martinez, M.D., Abbott Laboratories; Navdeep Thoofer and Wendy Snowden, GlaxoSmithKline.

### **Disclaimer**

The content is solely the responsibility of the authors and does not necessarily represent the official policies of the Department of Health and Human Services; nor does mention of any trade names, commercial practices, or organizations imply endorsement by the U.S. Government.
